# Supplementary material for: A generic approach for aligning liquid crystals using solution-processed 2D materials on ITO-free surfaces
Source: Royal Society of Chemistry journal article supplement (doi:10.1039/d4tc01507j), 2024-01-01
Supplement: d4tc01507j1.pdf [file d4tc01507j1.pdf]

## Supplementary information

### A generic approach for aligning liquid crystals using solution-processed 2D materials on ITO-free surfaces

Gayathri R. Pisharody,<sup>a,b</sup> Priyabrata Sahoo,<sup>a,b</sup> Abhishek Kumar Mishra<sup>c</sup>,  
D. S. Shankar Rao,<sup>a</sup> H. S. S. Ramakrishna Matte<sup>a\*</sup>, and S. Krishna Prasad<sup>a\*</sup>

<sup>a</sup>Centre for Nano and Soft Matter Sciences, Shivanapura, Bengaluru 562162 India

<sup>b</sup>Manipal Academy of Higher Education (MAHE), Manipal, 576104 India

<sup>c</sup>Department of Physics, Applied Science Cluster, School of Engineering, University of Petroleum and Energy Studies (UPES), Dehradun, 248007, India

[\\*skprasad@cens.res.in](mailto:skprasad@cens.res.in)

[\\*matte@cens.res.in](mailto:matte@cens.res.in)

#### Contents

1. Table showing the molecular structure and transition temperature of the materials employed for the study.
2. Setup of a sample placed over a POM to collect the transmitted intensity upon sample rotation along azimuthal angle.
3. XRD plot of h-BN/AZO substrate.
4. AFM topography and line profiles of h-BN nanosheets.
5. EDX spectrum of h-BN/AZO substrate.
6. Elemental mapping of h-BN/AZO substrate.
7. Unidirectional planar alignment of LC, E7 in the commercial PI/ITO cell.
8. Polar plot of transmitted intensity ( $I_T$ ) vs.  $\phi$  for E7 in h-BN/ITO and PI/ITO cell.
9. Measurement of birefringence intensity variation along two different lengths of the POM image from ITO cells and compared with literature.
10. Table showing the mean and standard deviation obtained from the birefringence analysis of the POM images and compared with the literature values.
11. Forward and backward dielectric response curves with applied DC bias (-30V to +30V) for PI/ITO layer.

Table S1: Table showing the molecular structure and transition temperature of the materials employed for the study

| Compound        | Molecular formula                                                                            | Phase sequence |
|-----------------|----------------------------------------------------------------------------------------------|----------------|
| <b>E7</b>       | 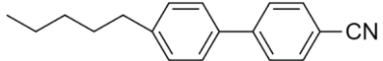 5CB (51%)  | I (57 °C) N    |
|                 |  7CB (25%)  |                |
|                 |  8OCB (16%) |                |
|                 |  5CT (8%)   |                |
| <b>E44</b>      | Structure not known                                                                          | I (118 °C) N   |
| <b>ZLI-2359</b> | Structure not known                                                                          | I (70.4 °C) N  |
| <b>PCPBB</b>    |          | I (124 °C) N   |
| <b>6OCN</b>     |          | I (135 °C) N   |

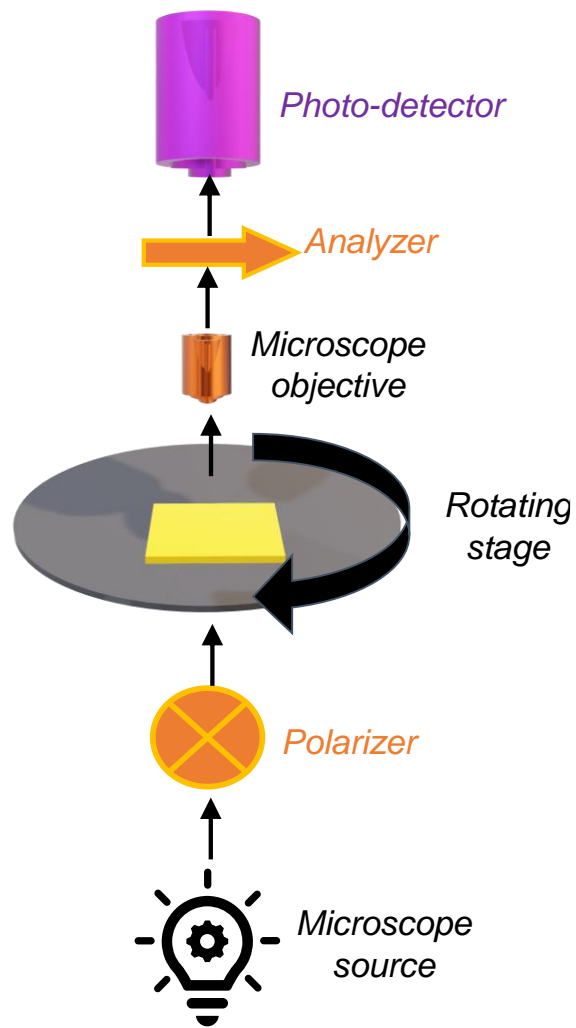

Figure S1: Schematics of the POM setup to collect the transmitted intensity upon sample rotation in azimuthal direction

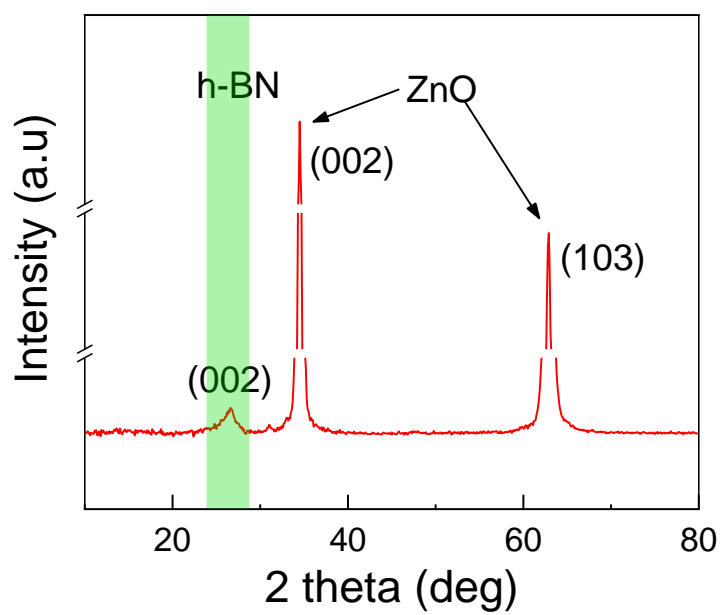

Figure S2: XRD plot of *h*-BN/AZO substrate. The region marked in green shows the diffraction from the (002) plane of *h*-BN. The diffraction from other planes corresponding to ZnO is also marked.

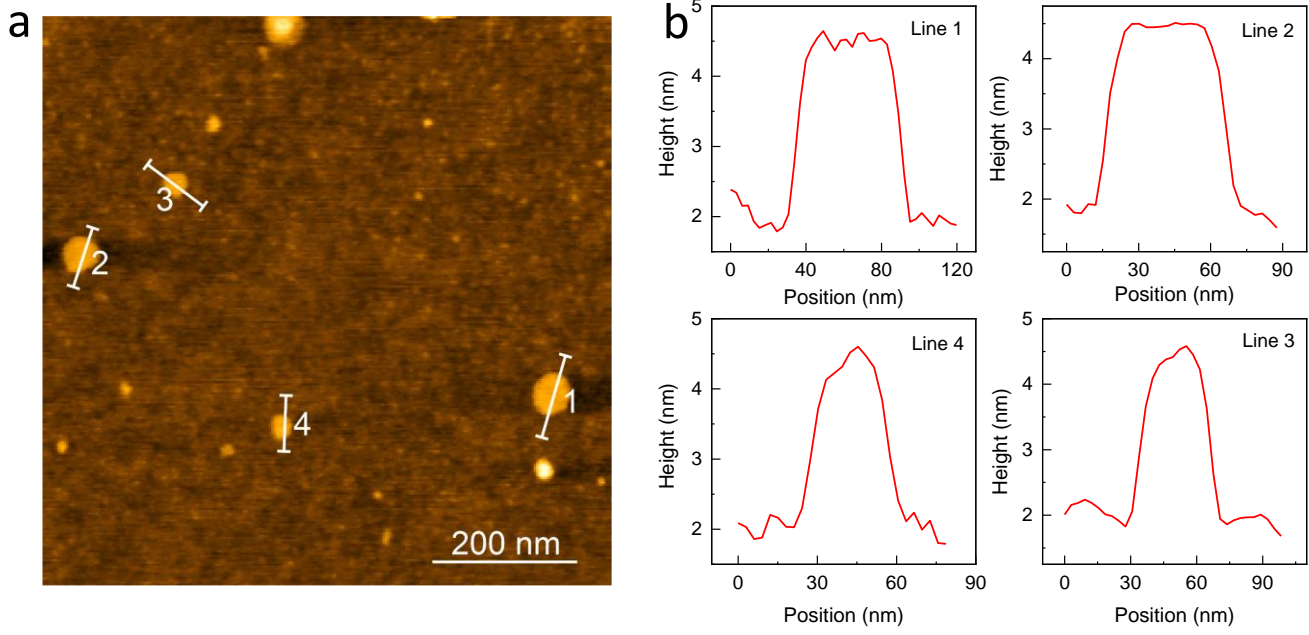

Figure S3: (a) AFM topography image of h-BN nanosheets, (b) line profiles showing the thickness of the various nanosheets.

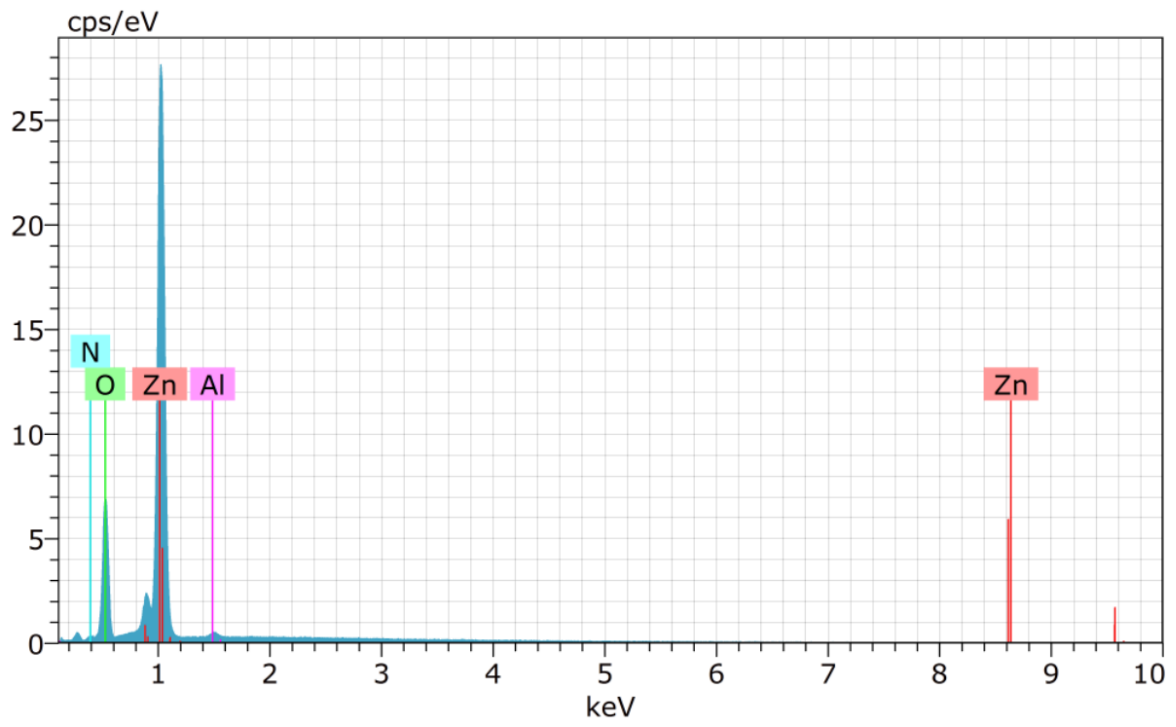

Figure S4: Energy dispersive X-ray (EDX) spectrum of h-BN/AZO substrate

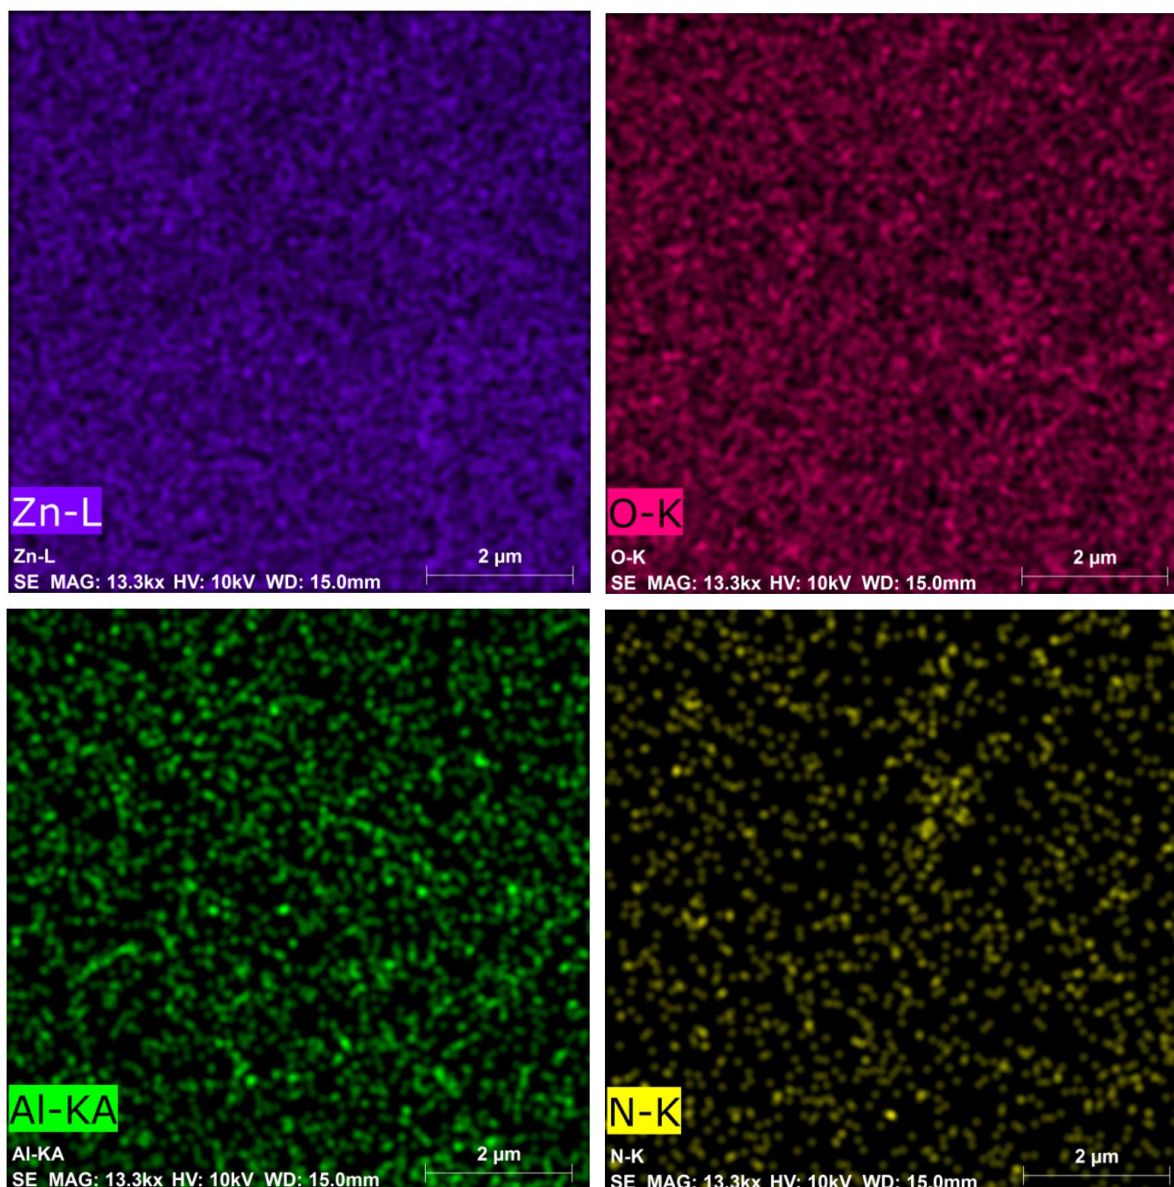

Figure S5: *Elemental mapping of Zinc, oxygen, aluminium and nitrogen in the h-BN/AZO substrate*

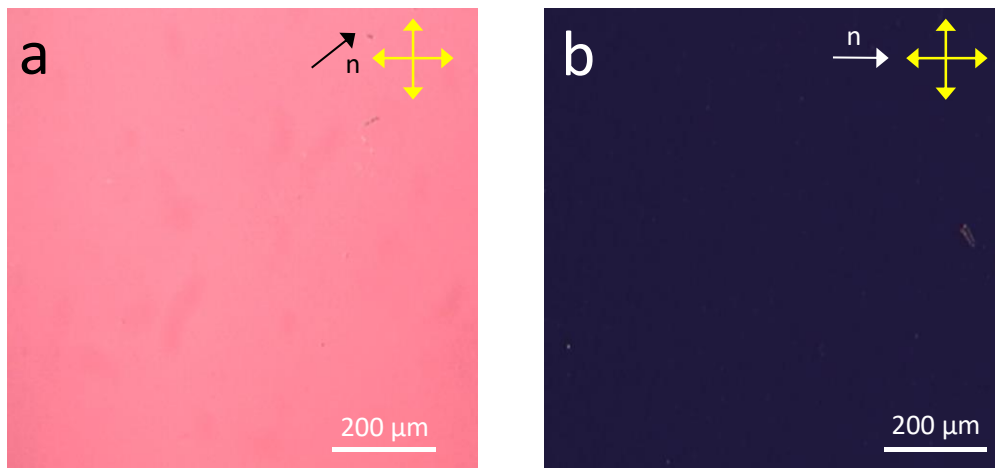

Figure S6: *Alignment of E7 in the commercial PI/ITO cell. The director orientation ( $n$ ) cell is (a) at  $45^\circ$ , and (b) at  $0^\circ$  with respect to the polarizer/analyzer orientation respectively.*



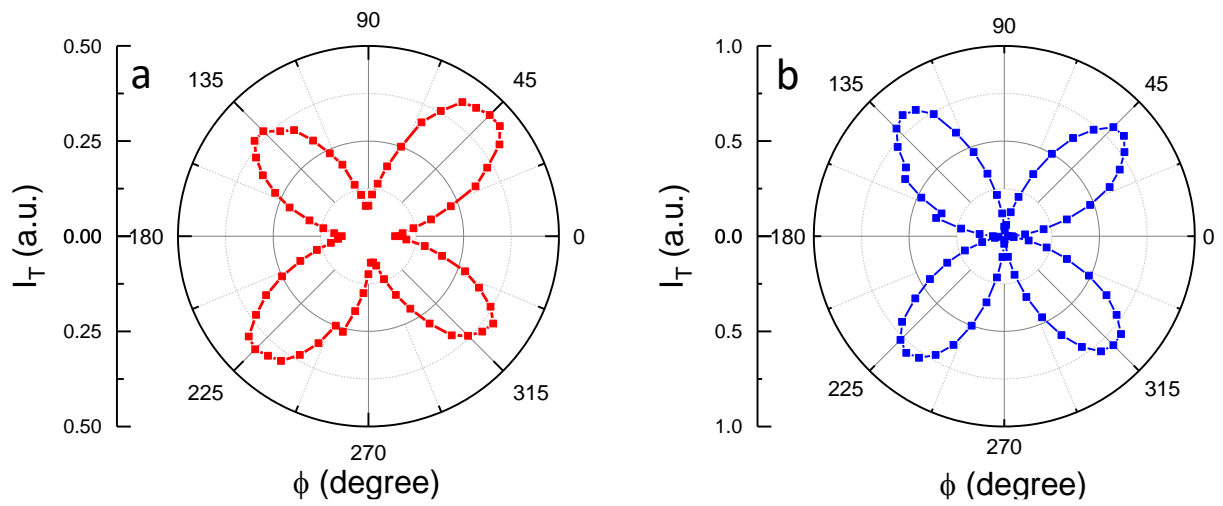

Figure S7: Polar plot of transmitted intensity ( $I_T$ ) vs. azimuthal rotation for E7 in (a) *h*-BN/ITO cell and (b) PI/ITO cell

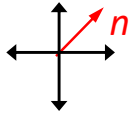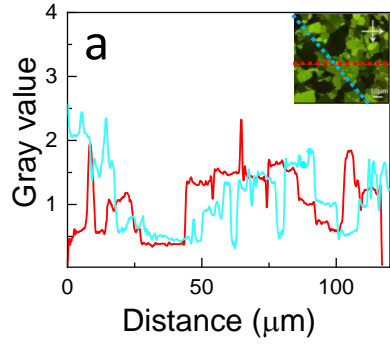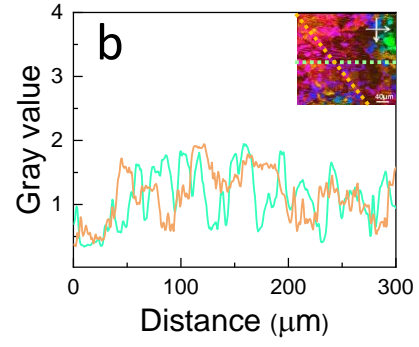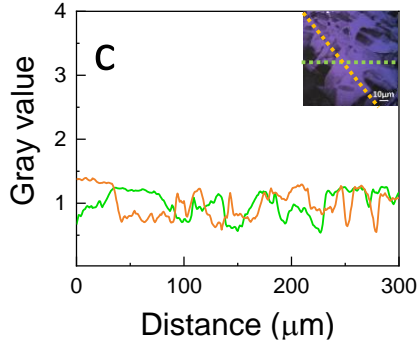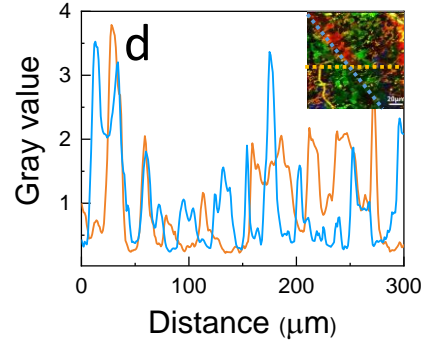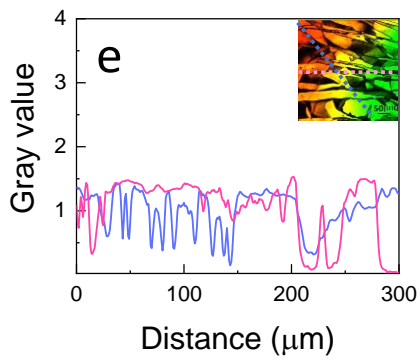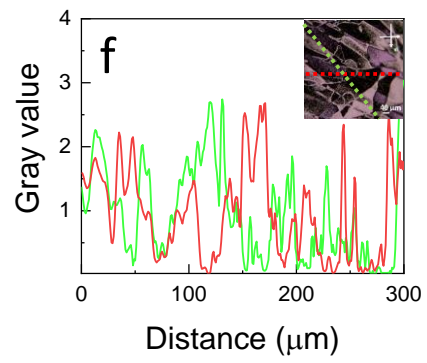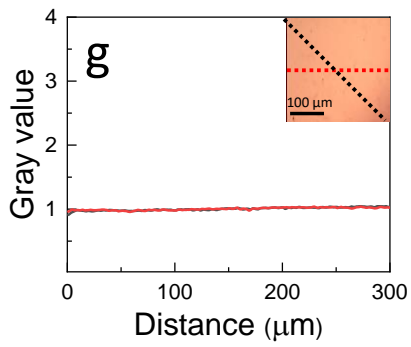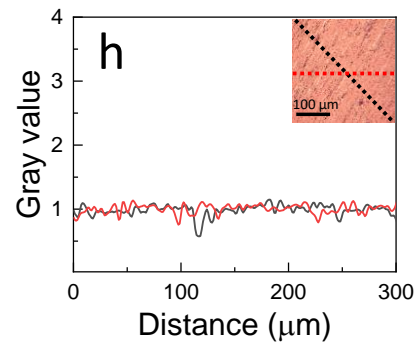

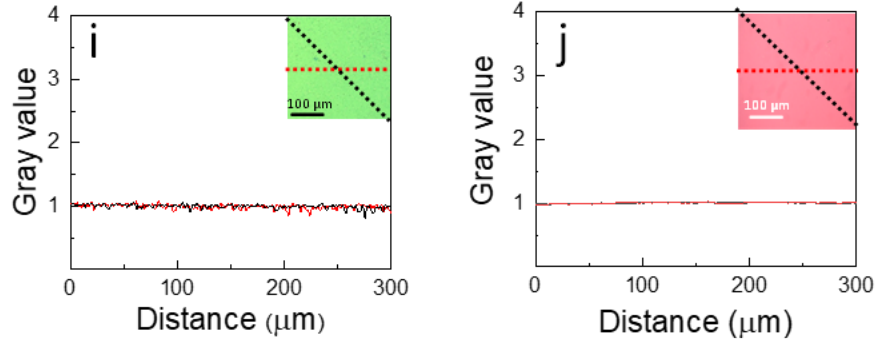

Figure S8: Measurement of birefringence intensity variation along two different lengths of the POM image for (a) CVD HOPG, (b) CVD h-BN, (c) CVD MoS<sub>2</sub>, (d) CVD HOPG/PVA, (e) CVD WSe<sub>2</sub>, and (f) CVD MoSe<sub>2</sub> cell filled with 5CB taken from Ref. 37, Ref. 39 and Ref. 40. Birefringence intensity variation in ITO/h-BN cell filled with (g) ZLI-2359, (h) E44, and (i) E7. (j) Birefringence variation of E7 filled in PI/ITO cell. Insets show the corresponding POM image taken for analysis. The dotted line indicates the path along which the gray value is measured.

Table S2: Mean and standard deviation obtained from the birefringence analysis of the POM images and compared with the literature values

| Conducting / underlying layer | Aligning layer        | LC used  | Mean Gray value | Standard deviation | References    |
|-------------------------------|-----------------------|----------|-----------------|--------------------|---------------|
| ITO                           | CVD-h-BN              | E7       | 168             | 9.6                | <i>Ref 32</i> |
| Silicon                       | CVD-h-BN              | 5CB      | 84              | 35                 | <i>Ref 40</i> |
| Silicon                       | CVD-graphene          | 5CB      | 54              | 27.2               | <i>Ref 40</i> |
| Silicon                       | CVD-MoS <sub>2</sub>  | 5CB      | 110             | 21.1               | <i>Ref 40</i> |
| Glass                         | CVD-HOPG/PVA          | 5CB      | 51              | 39                 | <i>Ref 39</i> |
| Silicon                       | CVD MoSe <sub>2</sub> | 5CB      | 53              | 41.5               | <i>Ref 37</i> |
| Silicon                       | CVD WSe <sub>2</sub>  | 5CB      | 91              | 28.1               | <i>Ref 37</i> |
| ITO                           | EPD-h-BN              | E7       | 173             | 5.1                | <i>Ref 31</i> |
| ITO                           | EPD-h-BN              | E44      | 175             | 8.9                | This work     |
| ITO                           | EPD-h-BN              | ZLI-2359 | 185             | 2.8                | This work     |
| AZO                           | EPD-h-BN              | E7       | 112             | 1.4                | This work     |
| AZO                           | EPD-h-BN              | E44      | 124             | 1.8                | This work     |
| AZO                           | EPD-h-BN              | ZLI-2359 | 107             | 4.2                | This work     |

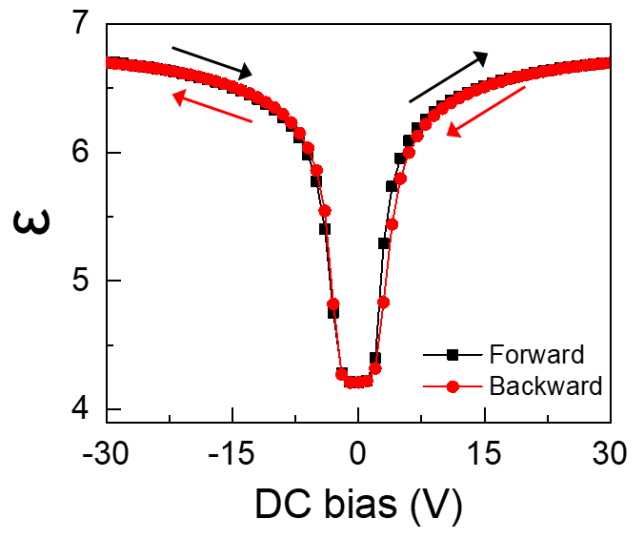

Figure S9: *Forward and backward dielectric response curves with applied DC bias (-30 V to +30 V) for PI/ITO layer*
